# Identifiability In Connectome Based Neural Mass Models

X. Xie<sup>a,\*</sup>, A. Kuceyeski<sup>a</sup>, S.A. Shah<sup>a</sup>, N.D. Schiff<sup>a</sup>, S. Nagarajan<sup>b</sup>, A. Raj<sup>a,b</sup>

<sup>a</sup>*The Brain and Mind Research Institute, Weill Cornell Medicine, New York City, NY, United States of America*

<sup>b</sup>*Department of Radiology and Bioengineering, University of California San Francisco, San Francisco, CA, United States of America*

---

## Abstract

Local dynamic activity within canonical micro-circuits in the brain can be described mathematically by neural mass models with parameters that introduce a variety of oscillatory behavior in local neuron populations. Advances in medical imaging have enabled quantification of the white matter connections that constitute whole brain networks or the "connectome". Recently, connectome-derived coupling terms have been introduced within an array of neural mass models to capture the long-range interactions between local neuronal populations. Although such network-coupled oscillator models are capable of producing steady-state power spectra similar to the brains empirical activity, it's unclear if the connectome's anatomical information is enough to recapitulate the spatial distribution of power spectra across brain regions. Furthermore, these models inherently comprise of hundreds of parameters whose choices have impact on model derived predictions of brain activity. Here we employ a Wilson-Cowan oscillator neural mass model coupled by a structural connectome network to observe the effect of introducing a connectivity and transmission delay to the frequency profile of the brain. We observe that inference of the many parameters of the high dimensional network model produces non-unique results. Parameter optimization of simulated power spectra to better match source localized EEG spectra showed that introducing structural information to neural mass models does not improve model performance. A combinatorial approach to optimizing local and

---

\*Corresponding author

*Email address:* xix2007@med.cornell.edu (X. Xie)

global parameters outperforms other model variations. We demonstrate the inherent identifiability problem in network models that pose challenges for the use of such high dimensional models as diagnostic tools for neurological diseases.

*Keywords:* Identifiability, Neural Mass Model, Connectome, Power Spectrum

---

## 1 Introduction

2 With the advancement of neuronal dynamics modeling, single-neuron  
3 models of spiking activity have given way to more granular neural field and  
4 neural mass models. One such established approach is modeling neuronal  
5 dynamics with the mean-field approach, i.e., modeling the average activity  
6 with a small number of state variables to summarize the behavior of a neural  
7 ensemble [1, 2, 3, 4]. A neural ensemble is a set of locally interacting neurons  
8 [5], and the properties of these neurons can be described in terms of their  
9 mean firing rate and mean postsynaptic potential, therefore a neural mass  
10 model can represent the lumped activity of a specific neuronal cell type or a  
11 particular functional area in the cortex [6, 7].

12 Several of these neural masses, located at different brain regions, may  
13 then be connected to yield whole-brain macroscopic models of brain activ-  
14 ity. Recent connectome studies have reproduced networks in both healthy  
15 [8, 9, 10] and diseased [11, 12, 13] human brains. Analysis using such con-  
16 nectomic [14] approaches focuses on generative simulation models to relate  
17 structural connectomes to their functional correlates [15, 16, 17]. Recent  
18 extensions of neural mass models have introduced realistic neuroanatomical  
19 information from diffusion tensor imaging paired with coupling parameters  
20 regulating the connectivity strength to explore and simulate the spatiotempo-  
21 ral dynamics of the brain [18]. In such models, various parameters reflecting  
22 differences in axonal and dendritic properties between neuronal populations  
23 are defined based on general assumptions made about the microscopic prop-  
24 erties of neurons. However, the addition of a global coupling parameter and  
25 a transmission delay based on anatomical axonal distances are an estimated  
26 abstraction of the brain's anatomical connections, it is unclear whether the  
27 addition of these parameters to a network is actually beneficial to the pa-  
28 rameter inference problem.

29 While it is encouraging that connectome-coupled oscillator models are

30 capable of displaying expected frequency behavior [4, 6, 7, 19] and can repro-  
31 duce functional connectivity to a limited extent [17, 20, 21], the current state  
32 of research leave open several important questions. It is still unclear if the  
33 network models of brain dynamics can recapitulate the spatial distribution  
34 of a brains frequency spectra with the help of a connectome. The observable  
35 alpha, beta, gamma, theta, and delta rhythms follow a spatially distributed  
36 pattern [22, 23, 24, 25, 26]. For example, the alpha range is distinctively  
37 shown in the occipital lobe and posterior temporal cortex [27, 28, 29, 30],  
38 while beta activity is present in the anterior brain regions and around the  
39 postcentral gyri [27]. Neural mass models are able to produce oscillations at  
40 each of these rhythms via variations of its local parameters at each neural  
41 ensemble, however, it is unclear if neural masses oscillating at the nodes of  
42 a structural connectivity network can recapitulate the spatial distribution of  
43 neuronal activity. In particular, brain regions display heterogenous patterns  
44 of connectivity, as well as widely varying local oscillatory behavior. Most  
45 likely, the combination of these factors affect the observable power spectra  
46 at each region due to the interconnected nature of the brain. Unfortunately,  
47 connectome-coupled neural mass models can have a very large number of  
48 local parameters in addition to the global parameters. This presents a po-  
49 tential challenge of over-fitting model parameters to empirical activity data.  
50 Thus, the key question of whether global coupling or local parameter diver-  
51 sity is responsible for observed activity patterns is not straight forward to  
52 evaluate. These are important issues, as much of the emerging computa-  
53 tional paradigm requires that connectivity-coupled NMMs be inferred from  
54 observed recordings, and assumes that the inferred model parameters are  
55 diagnostic of neurological disease, e.g. the Virtual Brain [30, 31, 32, 33].

56 The first challenge to addressing these questions is obtaining neuronal  
57 activity on the whole brain. While encephalography techniques can record  
58 at a high sampling rate, the detected signals are limited to whats observable  
59 via electrodes placed on the scalp. Fortunately, source localization tech-  
60 niques have been developed to estimate the dipole source activity inside the  
61 brain that generate the encephalography data to produce datasets with high  
62 spatiotemporal resolution. These source localized time series can provide av-  
63 erage activity for individual brain regions of interest (ROIs), which can be  
64 viewed as nodes on a network, to allow further investigation of functional  
65 and structural connectivity in a three-dimensional space.

66 In this article, we use an oscillating neural mass model (Wilson-Cowan[3])  
67 to recapitulate resting-state human electroencephalography data and repro-

68 duce the spatially distributed patterns of neuronal activity. The chosen  
69 model has a set of local parameters to simulate activity of a single node,  
70 but when a global coupling parameter and transmission delay is introduced,  
71 as governed by the subjects structural connectivity matrix, the model is able  
72 to simulate activity at all interconnected regions that are nodes of the con-  
73 nectome. We propose a careful simulated annealing algorithm for parameter  
74 fitting, using information theoretic measures of model performance. Our goal  
75 is to assess whether it is possible to distinguish between the three scenarios:  
76 1) individual oscillators at each brain region without structural connectivity,  
77 2) individual oscillators at each brain region with structural connectivity, and  
78 3) identical oscillators at each brain region with structural connectivity. We  
79 believe the addition of a connectome will improve the models ability to repro-  
80 duce empirical power spectra and the spatial patterns. Accurate inference  
81 of the model parameters in a complex network of interacting brain regions  
82 is incredibly difficult for any optimization method, the over-specification of  
83 the model results in identical solutions with various sets of inferred param-  
84 eters. We will specifically test the hypothesis that the addition of long-range  
85 connectivity to the coupled NMM will improve model performance, in com-  
86 parison to an alternate model that has no inter-regional interactions via net-  
87 work connectivity. Consequently, we also want to determine if the higher  
88 dimensional model with connectivity provide uniquely identifiable solutions  
89 to the parameter inference problem. These issues are very important for the  
90 potential utility of network-coupled neural mass models as diagnostic tools  
91 for neurological diseases, as previously proposed [30, 31, 32, 33].

## 92 2. Methods

### 93 2.1. Subjects and Data Collection

94 All experiments were conducted after obtaining written informed consent  
95 from the subjects and approval by The Institutional Review Board of Weill  
96 Cornell Medical College. T1-weighted anatomical MRI and diffusion-MRI  
97 scans were collected from 11 out of the 13 healthy individuals (8 male, 35.2  
98 +/- 12.25 years) on a 3.0 Tesla General Electric Signa Excite HDx (GE  
99 Healthcare, Waukesha, WI) clinical MRI system with an eight-channel head  
100 receive-only coil. DMRI scans were obtained using a spin-echo diffusion  
101 tensor pulse sequence with one T2-weighted image, 33 diffusion-weighted  
102 images (one subject is an exception with 55 directions) evenly distributed on a  
103 sphere with  $b = 1000$  s/mm<sup>2</sup>, TE = 76.7 ms, TR = 9000 ms, field of view = 22

104 cm, 28 slices of 5.0 mm thickness, matrix size = 128 x 128, reconstructed with  
105 zero filling to 256 x 256. An axial 3D IR-prepped, fast SPGR with parameters  
106 tuned to optimize brain tissue contrast sequence (BRAVO sequence) was used  
107 for anatomical imaging with inversion time = 400 ms, TR = 8.9 ms, TE = 3.5  
108 ms, flip angle = 13 degrees, axial field of view = 24 cm, 136 slices of 1.2 mm  
109 thickness, matrix size = 256 x 256, parallel imaging acceleration factor = 2.  
110 Additionally, eyes-open (EO) and eyes-closed (EC) Resting-state EEG data  
111 was collected for 9 out of the 13 healthy subjects. Recordings for a minimum  
112 of 110 seconds were performed with a 129-channel HydroCel Geodesic EEG  
113 Sensor Net (Electrical Geodesics, Eugene, Oregon). The impedance of all  
114 electrodes was  $< 75k\Omega$  at the beginning of the recording, the EEG signals  
115 were sampled at 250 Hz sampling frequency and filtered from DC to 100Hz.  
116 Datasets were chosen for analysis only if all data modalities were present  
117 without unacceptable levels of noise or artifacts.

## 118 *2.2. Structural Connectivity Networks*

119 Structural and diffusion MR volumes were co-registered and pre-processed  
120 in the manner previously described [34]. Segmentation of gray matter, white  
121 matter, and cerebrospinal fluid was performed after slice-timing correction,  
122 realignment, co-registration and/or normalization, and spatial smoothing  
123 was performed using SPM8 (Statistical Parametric Mapping tool). The gray  
124 matter was further parcellated into 86 anatomical regions of interest (ROIs)  
125 based on the Desikan-Killany atlas using the established FreeSurfer package  
126 [35]. The parcellated regions were used to seed tractography nodes in co-  
127 registered diffusion MRI volumes. The connectivity between any two regions  
128 was given by a weighted sum of tracts going between them as described by  
129 [36]. The algorithm traces likely white matter fiber tracts by taking into  
130 account tissue probability maps as well as diffusion orientation in a Bayesian  
131 manner, the tracing stopped when the track angle between steps exceeded  
132  $\pi/3$  or when encountering a voxel that is outside of the white matter mask.

## 133 *2.3. Source Localization*

134 Source localization of the EEG signals was performed with Brainstorm  
135 [37], which is documented and freely available for download online under the  
136 GNU general public license (<http://neuroimage.usc.edu/brainstorm>). Prior  
137 to source localization, the raw EEG data were band-pass filtered between 2  
138 and 45 Hz, transience time segments and unusable channels were manually  
139 removed after inspecting the time series and its power spectrum. We then

140 applied an average reference followed by independent component analysis to  
141 remove artifacts such as eye blinks and heart beats that are picked up by the  
142 EEG electrodes, removal of additional noisy time segments was performed  
143 manually after inspection.

144 Source localization was performed with a "warped" Colin27 template  
145 head model to remove variations due to noise level, head position, and  
146 starting/ending slices for MRI acquisition runs. The Colin27 template is a  
147 stereotaxic average of 27 T1-weighted MRI scans of a single individual's head  
148 [38]. To incorporate individual subject's anatomical information, we created  
149 pseudo-individual anatomies using Brainstorm's warp anatomy functions to  
150 deform and scale the high resolution Colin27 head shapes to match each sub-  
151 ject's individual head shapes. Surface meshes of the brain, skull, and scalp  
152 were extracted from the template MRIs using 1922 vertices per layer. To  
153 obtain an analytical approximation of the lead field for the conductive brain  
154 volume, we chose to use the three-shell spherical harmonics expansion meth-  
155 ods as discussed by [39]. Specifically, an initial grid of 4000 source points  
156 was generated from the cortex surface and samples the brain volume in an  
157 adaptive manner towards the center of the brain, each grid layer is down-  
158 sampled by a factor of 3 for a maximum of 17 layers, resulting in a total  
159 of 11151 to 16442 dipole sources depending on individual head anatomy. A  
160 representative visualization of the dipole sources is shown in Fig. S1.

161 To obtain the inverse solution, a noise covariance matrix was calculated  
162 over the EEG recordings to model the noise contaminating our data; only  
163 the diagonal elements were kept for the inverse solution to estimate the vari-  
164 ance of each sensor. For all subjects, the activity at each dipole source  
165 was estimated using a linearly constrained minimum variance (LCMV) spa-  
166 tial filter [40]. Three-dimensional dipole sources yielded a 4D time series  
167 ( $x \times y \times z \times time$ ) for each set of EEG recordings. The norm of the 3 spatial  
168 coordinates ( $\sqrt{x^2 + y^2 + z^2}$ ) at each time point was taken to produce a 1D  
169 time series of estimated activation over the entire dipole. An average time  
170 series was obtained for all sources belonging to each of the same 86 ROIs  
171 as defined previously (See Fig. S1 for visualization of the dipoles), and the  
172 source localized time series were used as empirical data for modeling training.

#### 173 *2.4. Wilson & Cowan Neural Mass Model*

174 To model neurophysiological activity from anatomical architecture for  
175 each ROI, we adopt the Wilson-Cowan coupled oscillators [3]. This model  
176 assumes that a local circuit consists of two lumped masses of excitatory

177 and inhibitory neural populations interacting with each other, whole brain  
 178 regional dynamics are achieved by coupling local masses via structural con-  
 179 nectivity  $A_{jk}$ , global coupling parameter  $c_5$ , and a transmission delay  $\tau_d^{k,j}$ .  
 180 The simulated average activity at the  $j^{th}$  brain region is:

$$\tau_e \frac{dE_j}{dt} = -E_j(t) + (S_{e_{max}} - E_j(t))S_e(c_1 E_j(t) - c_2 I_j(t) + c_5 \sum_k A_{jk} E_k(t - \tau_d^{k,j}) + P_j(t)) + \sigma w_j(t) \quad (1)$$

$$\tau_i \frac{dI_j}{dt} = -I_j(t) + (S_{i_{max}} - I_j(t))S_i(c_3 E_j(t) - c_4 I_j(t)) + \sigma v_j(t) \quad (2)$$

181 Where  $E(t)$  and  $I(t)$  represent the firing rate of the excitatory and in-  
 182 hibitory neuronal populations respectively,  $\tau$  is a time constant and  $w_j(t)$  and  
 183  $v_j(t)$  are random normally distributed noise with standard deviation  $\sigma$ .  $P(t)$   
 184 is an external input parameter to the excitatory neural ensemble that controls  
 185 oscillatory activity, local parameters  $c_1$ ,  $c_2$ ,  $c_3$ , and  $c_4$  represent the average  
 186 number of excitatory and inhibitory synapses within a neuronal ensemble.  
 187  $S_e$  and  $S_i$  are transfer functions characterized by the sigmoidal function cap-  
 188 turing the non-linear response of a cell generating an action potential based  
 189 on summed synaptic input:

$$S_{\frac{e}{i}}(x) = \frac{1}{1 + e^{-a_{\frac{e}{i}}(x - \theta_{\frac{e}{i}})}} - \frac{1}{1 + e^{\frac{a_{\frac{e}{i}} \theta_{\frac{e}{i}}}{x}}} \quad (3)$$

190 Different variations of this model (Fig. 1) can simulate average neuronal  
 191 activity at each region in the brain. Here, we will compare three models  
 192 (1) the varying oscillator (VO) model that consists of varying local neuronal  
 193 ensemble with only locally defined parameters and no inter-connectivity be-  
 194 tween nodes, (2) the varying oscillator plus connectome (VOC) model that  
 195 consists of local neuronal ensembles with varying local parameters, plus a  
 196 global coupling parameter, structural connectivity, and transmission delay,  
 197 and (3) the identical oscillators plus connectome (IOC) model that consists  
 198 of local neuronal ensembles with uniform local parameters, plus a global  
 199 coupling parameter, structural connectivity, and transmission delay.

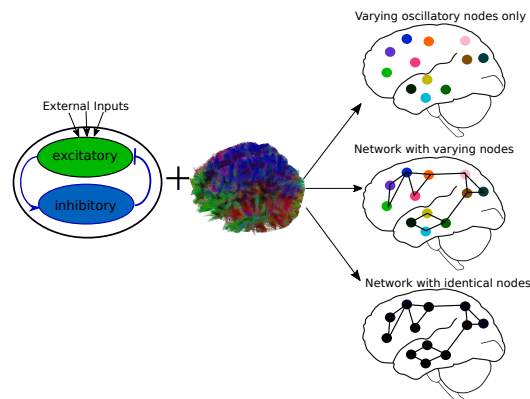

Figure 1: Variations of the Wilson-Cowan model. Varying oscillators (VO) at each node without connectivity, varying oscillators at each node plus connectome (VOC), or identical oscillators at each node plus connectome (IOC)

## 200 2.5. Evaluating Oscillatory Abilities of the Neural Mass Model

201 To assess if the neural mass models are able to produce a frequency pro-  
 202 file that covers all signature physiological frequency bands, we performed 2-  
 203 seconds simulations with varying parameters. Firstly, simulations at a single  
 204 node with no connectivity were performed with varying excitatory and in-  
 205 hibitory time constant parameters ( $\tau_e, \tau_i$ ) operating in the range  $1ms - 40ms$   
 206 with a step size of  $1ms$  and an external driving parameter of  $P(t) = 2.5$ .  
 207 When the structural connectivity matrix is introduced, the global coupling  
 208 parameter  $c_5$  and transmission velocity also dictate oscillatory activity. For  
 209 the 86-region network model, we varied the global coupling parameter from 0  
 210 to 3 with a step size of 0.2. Upon identifying the value of  $c_5$  for which the net-  
 211 work model transitioned to oscillatory behavior (as done previously in [18]),  
 212 additional 1-second simulations were performed with varying transmission  
 213 velocity from  $5m/s$  to  $50m/s$  with a step size of  $5m/s$ . The power spectra  
 214 of each simulation were computed to select the peak oscillatory frequency.  
 215 All power spectra calculations were performed with MATLAB's multi-taper  
 216 power spectral density destimate function *PMTM*. Simulations were per-  
 217 formed with default local parameters as illustrated in [18]:  $c_1 = 16, c_2 =$   
 218  $12, c_3 = 15, c_4 = 3$ , and sigmoidal function parameters:  $a_e = 1.3, a_i = 2, \theta_e =$   
 219  $4, \theta_i = 3.7$ .



220 *2.6. Model Optimization*

221 The model was implemented using simulation runs of 3 seconds, using a  
 222 numerical integration time step of  $\Delta t = 0.004$  sec or  $250Hz$  with MATLAB's  
 223 *ode45* function. The noise term in the model was removed to maintain an  
 224 unchanging parameter space during optimization. To improve the odds that  
 225 we capture the global minimum of a suitably defined goodness of fit (GOF)  
 226 criterion in our parameter space, we chose to implement the probabilistic  
 227 approach of simulated annealing [41]. The algorithm samples a very large  
 228 set of parameters within a set of boundaries by generating an initial trial  
 229 point and choosing the next trial point from the current point by a probability  
 230 distribution with a scale depending on the current "temperature" parameter.  
 231 While the algorithm always accepts new trial points that map to cost-function  
 232 values lower than the previous cost-function values, it will also accept trial  
 233 points that have cost-functions with greater values than the previous point  
 234 to move out of local minima. The acceptance probability function is  $1/(1 +$   
 235  $e^{\frac{\Delta}{max(T)})$ , where  $T$  is the current temperature and  $\Delta$  is the difference of the  
 236 new minus old cost-function values.

237 Our cost-function was defined as the two-sample Kolmogorov-Smirnov  
 238 (KS) statistic between the empirical source localized spectra and simulated  
 239 spectra from each model variation. The initial parameter value and boundary  
 240 constraints for each parameter are given in Table 1; these had the same values  
 241 regardless of model variation.

|                                           | Initial Value              | Lower/Upper Boundary |
|-------------------------------------------|----------------------------|----------------------|
| Time constants $\{\tau_e, \tau_i\}$       | 20ms                       | [5ms, 30ms]          |
| Local Parameters $\{C_1, C_2, C_3, C_4\}$ | 16, 12, 15, 3 respectively | [1, 20]              |
| Global Coupling $C_5$                     | 1.5                        | [0, 10]              |
| Transmission Velocity                     | 10m/s                      | [5m/s, 30m/s]        |
| External Input $P(t)$                     | 2.5                        | [2.0, 3.0]           |

Table 1: Initial values and boundary constraints for all model parameters in the simulated annealing optimization

242 All simulated annealing runs were allowed to iterate over the parameter  
 243 space for a maximum of  $N_p \times 500$ , where  $N_p$  is the number of parameters  
 244 in the model. To ensure the optimization algorithm thoroughly scanned  
 245 the parameter space and arrived at a global minimum within the bound-  
 246 ary constraints, the initial temperature was raised to 200 (default = 100)

247 for all parameters, and the cooling schedule was set to the average of the  
248 quotient between initial temperature and the iteration number for each pa-  
249 rameter. Such a cooling schedule ensures that the temperature is low at  
250 high iteration counts, so that the optimization algorithm only travels along  
251 the downward slope of the current minimum. The VO model was optimized  
252 first to obtain parameters for time constants, local parameters, and the ex-  
253 ternal drive parameter. Then these local parameters were fixed in the VOC  
254 model optimization that focused on the global parameters of global coupling  
255 and transmission velocity. The IOC model’s optimization was performed to  
256 identify global parameters and one set of local parameters for all 86 brain  
257 regions. To ensure that we reached the optimal parameters for the VOC  
258 model, we performed an additional optimization where the local parameters  
259 were allowed to vary. A conditional minimization algorithm was employed  
260 where simulated annealing was performed alternatively for local parameters  
261 and global parameters over 10 iterations (VOC-CM). Upon the 10th itera-  
262 tion, four subjects showed slight decreases in cost-function evaluation from  
263 the 9th iteration. Upon further inspection, their changes in cost-function  
264 was smaller than 0.5% from the previous iteration. To ensure convergence,  
265 we continued their optimization to 15 iterations to avoid local minima.

### 266 *2.7. Model Performance and Analysis of Simulated Power Distribution*

267 Simulated power spectra were obtained after reintroducing the Gaussian  
268 noise term ( $\sigma = 0.00001$ ) back into the model and allowing it to run for  
269 the duration of the simulations. We calculated the average spectra over  
270 10 different model simulations to account for noise for each set of optimized  
271 parameters. Each brain region’s source localized and simulated power spectra  
272 were split into alpha ( $8 - 12Hz$ ) and beta ( $12 - 25Hz$ ) bands, the total  
273 power in each band were computed by summing the normalized power after  
274 subtracting the mean at each frequency bin. Visualization of regional alpha  
275 and beta band power are displayed on glassbrains generated with an open-  
276 source tool ”Brainography” developed by our group [42].

277 We also computed the Kolmogorov-Smirnov statistic between the source  
278 localized spectra and each model variations simulated spectra for each brain  
279 region. Due to the non-Gaussian distribution in the Kolmogorov-Smirnov  
280 statistic at the end of all simulations, a Wilcoxon rank-sum test was used  
281 to compare the distribution of Kolmogoriv-Smirnov statistics between the  
282 three model versions. All parameters that fell within  $\pm 1\%$  of the median op-  
283 timized Kolmogorov-Smirnov statistics in VO and VOC-CM were extracted

284 for visualization of their distribution.

### 285 **3. Results**

286 Only 7 subjects had complete sets of usable EEG, MRI, and DTI data,  
287 so we proceeded with analyses using only those subjects.

#### 288 *3.1. Model parameters produce oscillations in all frequency ranges*

289 To ensure that our proposed model variations can produce oscillations in  
290 most physiological frequencies, we repeatedly simulated single node dynam-  
291 ics without any connectivity for 2-seconds while systematically varying the  
292 excitatory and inhibitory time constants. For each combination of the time  
293 constants, we examined whether the model produced an oscillatory wave  
294 form, and the peak frequency of the oscillations was extracted and assigned  
295 to a defined frequency band. Figure 2 clearly shows that the model is able to  
296 produce all frequencies up to  $45Hz$ . More importantly, the entire frequency  
297 range is covered by time constants ranging from  $0-40ms$ , which is consistent  
298 with most models [4, 6, 19, 43, 44]. For each frequency band, a characteris-  
299 tic waveform is shown with its corresponding power spectra. External input  
300  $P(t)$  was set to  $P(t) = 2.5$  to ensure the uncoupled model is in a limited cycle  
301 regime within the normal biological range for neuronal activity. The effect  
302 of the external drive parameter is shown in Figure S3, where the simulations  
303 show oscillatory behavior near  $P(t) = 2.5$ .

304 Using the same set of local parameters, we simulated the network dynam-  
305 ics of 86 interconnected regions using one structural connectivity matrix,  
306 a transmission velocity of ten meters per second, and varying global cou-  
307 pling parameter  $c_5$  ranging from 0 to 3. A representative subject's structural  
308 connectome i.e. weighted connectivity matrix whose elements represent the  
309 amount of fiber tracts connecting different regions, is given in Fig. S2. The  
310 external input parameter was lowered to  $P(t) = 1.5$  for these simulations  
311 to make sure that global coupling and connectivity was the main driver of  
312 oscillations (see Fig S3). The specific external input parameter value was cho-  
313 sen because [18] showed default model parameters injected with  $P(t) = 1.5$   
314 shifted the model from a low oscillatory state to a high oscillatory state.

#### 315 *3.2. Optimized neural mass models*

316 Most optimizations terminated upon reaching the maximum number of it-  
317 erations allowed, which is  $N_{parameters} \times 500$  iterations. However, the minimum

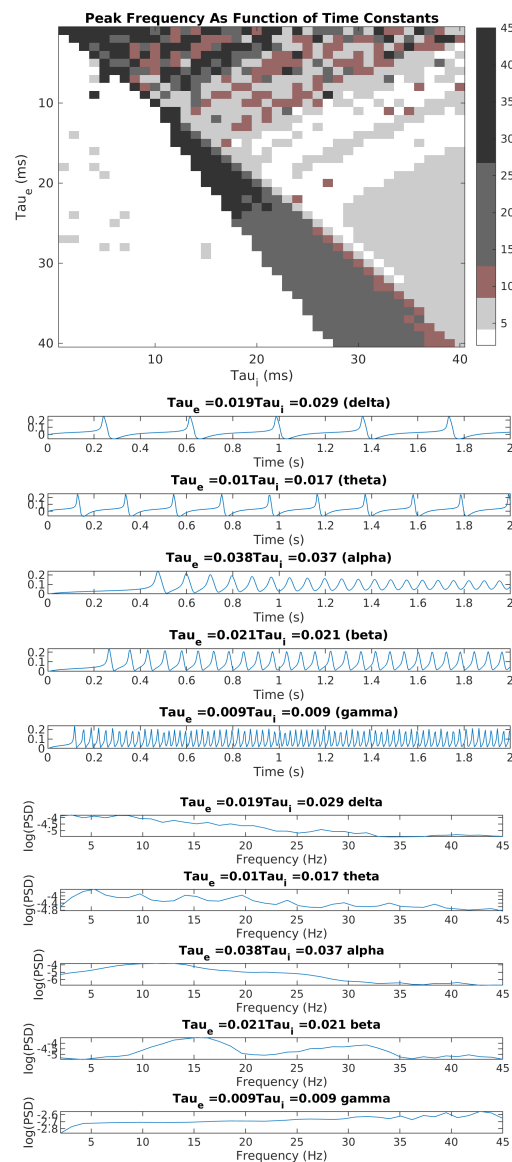

Figure 2: Peak frequency depends on time constants. Top: Heat map of models peak frequency (Hz) as a function of the excitatory and inhibitory time constants. Middle: oscillatory time course showing different peak frequencies, their corresponding power spectra is shown to the bottom.

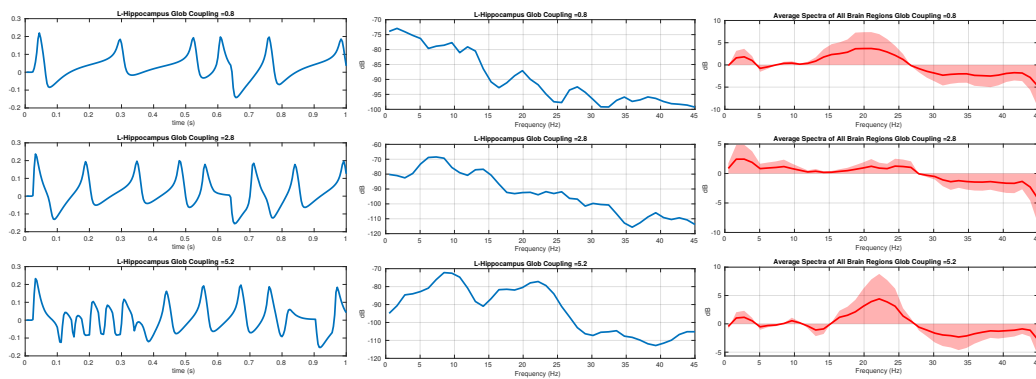

Figure 3: Global coupling controls oscillations. As the global coupling parameter increases, the simulated time series of a particular region is oscillating at higher frequencies as shown on the left column, each time series' corresponding power spectra is shown in the middle. The right column shows the average spectra of all 86 brain regions after removing the mean. Transmission velocity between brain regions was held to a constant ( $10m/s$ ) for all simulations.

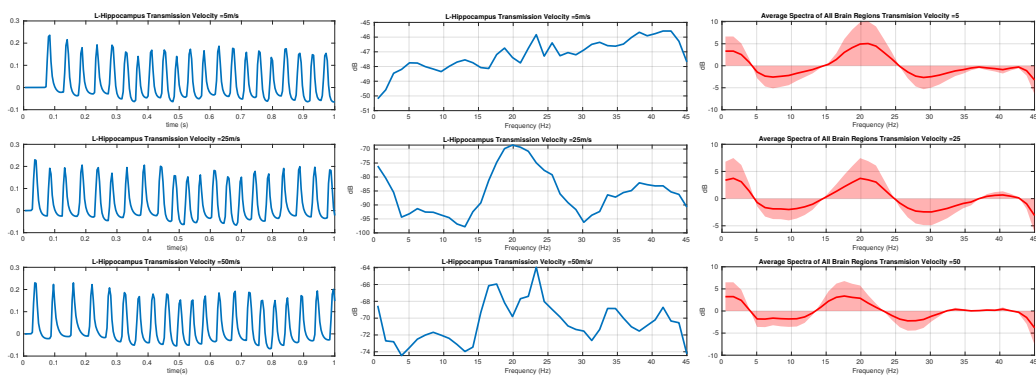

Figure 4: Transmission velocity and oscillatory behavior. In the network model, increasing the transmission velocity causes a time shift of the incoming signal; the left column shows the effect of the delay on 1 second simulated time course. The middle column shows the effect of transmission velocity on the corresponding power spectra. The right column shows the average spectra of all 86 brain regions after removing the mean. Global coupling was held to  $c_5 = 1.5$  for all simulations.

318 within the boundary constraints was acquired before reaching the maximum  
319 iteration, the simulated annealing algorithm accepts additional function eval-  
320 uations after acquiring a minimum to scan the rest of the parameter space,  
321 none of the optimization runs terminated while the cost-function evaluations  
322 were decreasing. None of the optimized parameters were reported to be equal  
323 to the upper or lower boundary, thus the specified range was not overly nar-  
324 row, and a minimum was found within the bounds in all cases. The mean and  
325 standard deviation of all parameters are reported in Table 2. Recall that the  
326 three models we evaluated were: regionally varying oscillators (VO), region-  
327 ally identical oscillators coupled by structural connectivity (IOC) and, region-  
328 ally varying oscillators coupled by connectivity (VOC). We also evaluated the  
329 VOC model with iterative optimization of local and global parameters (de-  
330 noted (VOC-CM). We observe that there is a difference between excitatory  
331 and inhibitory local parameters ( $c_1, c_3$  and  $c_2, c_4$  respectively), with the ex-  
332 citatory constants being consistently larger than inhibitory constants across  
333 all model variations. This slight variation between excitatory and inhibitory  
334 parameters in network models reflect physiological conditions and is crucial  
335 in producing functional neuronal activity. In terms of time constants, we see  
336 the excitatory term being slightly lower than the inhibitory term. Similarly,  
337 global coupling parameters are relatively low in VOC models compared to  
338 IOC, however, we see that IOC model parameters have high optimal values as  
339 well as high variation across all subjects, suggesting that higher connectome  
340 coupling is required to optimize the IOC model.

341 Figure 5 shows the cost-function values for the conditional minimization  
342 iterations over the global and local parameters in the VOC-CM optimization  
343 task. We see that the local parameter optimization iterations always result  
344 in a lower cost-function value than when optimizing over global parameters.  
345 However if we compare all of the global cost-function values and all the local  
346 cost-function values we see a downward trend in both that begins to flatten  
347 around iteration 7. Further iterations do not materially improve the fits, as  
348 it appears that the CM optimization has converged. The jaggedness of the  
349 curve also shows the importance of allowing an increase in the cost-function  
350 between the local- and global-steps, since otherwise no global step would  
351 improve upon the initial solution involving only local optimization. The CM  
352 performance for all all subjects is shown in Fig. S4.

353 Figure 6 shows the boxplots of the Kolmogorov-Smirnov (KS) statistic  
354 between the source localized power spectra and its corresponding simulated  
355 power spectra from each model variation over each of the 86 brain regions

|                             | <b>VO</b>                                                                                    | <b>VOC</b>           | <b>VOC-CM</b>                                                                         | <b>IOC</b>                                                                                   |
|-----------------------------|----------------------------------------------------------------------------------------------|----------------------|---------------------------------------------------------------------------------------|----------------------------------------------------------------------------------------------|
| Time constants (ms)         | $\tau_e = 15.2(3.0)$<br>$\tau_i = 19.4(2.9)$                                                 |                      | $\tau_e = 15.7(2.6)$<br>$\tau_i = 18.2(2.7)$                                          | $\tau_e = 18.1(9.0)$<br>$\tau_i = 24.8(8.8)$                                                 |
| Local Parameters            | $c_1 = 14.38(1.502)$<br>$c_2 = 9.989(2.166)$<br>$c_3 = 15.19(1.534)$<br>$c_4 = 6.117(1.794)$ |                      | $c_1 = 16.23$<br>$c_2 = 7.497(1.541)$<br>$c_3 = 16.63(0.955)$<br>$c_4 = 4.633(1.153)$ | $c_1 = 17.09(3.465)$<br>$c_2 = 5.032(3.743)$<br>$c_3 = 19.13(1.000)$<br>$c_4 = 4.082(2.711)$ |
| External Input              | $P(t) = 2.664(0.094)$                                                                        |                      | $P(t) = 2.660(0.013)$                                                                 | $P(t) = 2.607(0.409)$                                                                        |
| Global Coupling             |                                                                                              | $c_5 = 0.018(0.043)$ | $c_5 = 0.003(0.0075)$                                                                 | $c_5 = 5.093(3.697)$                                                                         |
| Transmission Velocity (m/s) |                                                                                              | $v = 8.714(4.455)$   | $v = 11.24(3.56)$                                                                     | $v = 11.75(5.506)$                                                                           |

Table 2: Mean (standard deviation) of model parameters for all model variations. VO = Varying Oscillators, VOC = Varying Oscillators with Connectome, VOC-CM = Varying Oscillators with Connectome and optimized by CM, IOC = Identical Oscillators with Connectome.

356 in each of the 7 subjects. The best performing model was the individual  
357 oscillators fitted to the source localized spectra at each node (VO). VO and  
358 VOC-CM was able to minimize the KS-statistic by optimizing for each in-  
359 dividual ROI, whereas IOC and VOC required minimizing for the average  
360 KS-statistic of all 86 ROIs, therefore a high variance around the median is  
361 shown in their box-plots. Contrary to our belief that connectivity improves  
362 fitting, introducing a connectome and global coupling to optimized oscil-  
363 lators resulted in higher cost-function evaluations (VOC). Using one set of  
364 local parameters for all brain regions in IOC produced similar results to VOC  
365 ( $P = 0.1899$ ). On the other hand, optimizing the VOC model variation with  
366 the CM algorithm resulted in a much better model performance; the model  
367 fit of VOC-CM was significantly better than IOC and VOC ( $P < 0.0001$ ).

368 To determine the effect of global coupling on model performance, we  
369 gradually increased the global coupling parameter in the VOC model while  
370 holding transmission velocity constant. We had hypothesized that introduc-  
371 ing global coupling, structural connectivity, and transmission delay would  
372 improve the parameter space and yield a lower cost-function, but our results  
373 show the exact opposite. Figure 7 shows that introducing global coupling is  
374 an uphill move in terms of cost-function evaluations and the corresponding  
375 changes in parameter space does not improve model performance. Alongside  
376 Fig 5 and 6, we see that re-optimizing for the global coupling and transmis-  
377 sion velocity parameters in VOC cannot return the cost-function evaluations

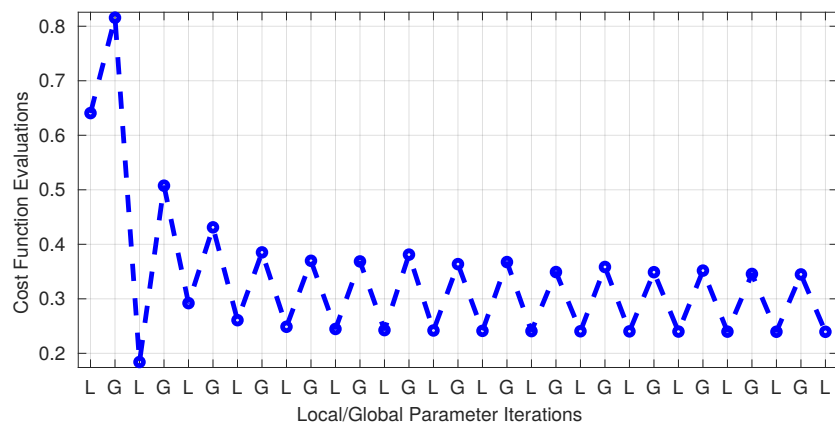

Figure 5: Conditional minimization performance. The CM algorithm alternatively optimized local parameters and global parameters of the VCN model for 15 iterations. The optimized local parameters consistently resulted in lower cost-function evaluations than global parameters over all iterations. The final iteration was used as the set of optimized parameter for further analysis.

378 to the minimum achieved by local parameters only (VO).

379 The source localized power spectra of all regions and their corresponding  
 380 simulated power spectra for each model variation are visualized in Fig. 8.  
 381 The source localized spectra show a clear alpha peak at  $8 - 12Hz$  and a beta  
 382 peak with lower power at near  $20Hz$ , which is characteristic of normal neu-  
 383 rophysiological frequency profiles. Consistent with our KS-statistic results in  
 384 Fig. 6, we see that the average IOC spectra does not show these characteris-  
 385 tic peaks while other model variations do to a limited degree. The optimized  
 386 parameters in Table 2 show relatively high variances in IOC compared to  
 387 other models, and the parameter means between excitatory and inhibitory  
 388 time constants differ by a small amount, suggesting the optimization algo-  
 389 rithm had trouble converging onto a parameter range that is suitable for this  
 390 mode lvariation. The consequence of having identical parameters for each  
 391 node and small differences between excitatory and inhibitory parameters for  
 392 IOC is shown in Fig. 8, where each region’s spectra are less likely to have  
 393 various peaks and troughs. Despite the VO and VOC-CM spectra having a  
 394 lower KS-statistic than other spectra in Fig. 6, their beta activity is not as  
 395 distinct as what’s shown in the source localized spectra in Fig. 8. Finally,  
 396 with the exception of IOC, the remaining model variations recapitulates the  
 397 observed alpha peaks in the source localized spectra to a limited degree.



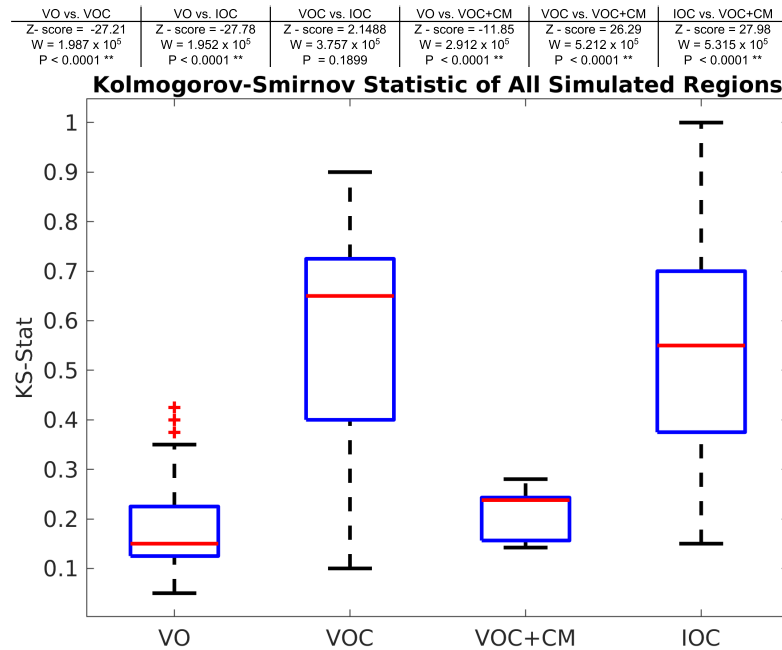

Figure 6: Comparison of model performance. Summary of Kolmogorov-Smirnov statistics between different model variations (VO = varying oscillators, VOC = varying oscillators with connectome, VOC+CM = varying oscillators with connectome, optimized via CM, IOC = identical oscillators with connectome) over all 86 ROIs and all 7 subjects. A Wilcoxon rank-sum test was used to compare the different model values (shown in the top table). All p-values reported were adjusted for multiple comparisons (Bonferroni).

### 398 3.3. Spatially distributed patterns of power spectra

399 Figure 9 illustrates via surface-plots the alpha band power ( $8 - 12Hz$ )  
400 over the entire brain for the observed and simulated spectra averaged from  
401 all subjects. Each of the cortical regions are colored by the intensity of that  
402 region's alpha power scaled by the mean alpha power over the entire brain.  
403 As expected, the source localized spectra (top row) shows relatively larger  
404 spheres in the posterior regions of the brain. The VO, VOC, and VOC-CM  
405 models show the same trend, although they are distributed more laterally  
406 than the observed alpha distribution. The IOC model did not match the  
407 alpha spectra spatial pattern at all, with only a small number of regions that  
408 contain alpha powers significantly above the mean. The Pearson's correlation  
409 coefficients are displayed on top of each glass-brain plot, and as expected,  
410 VO and VOC-CM had the highest correlation when comparing the 86 brain  
411 region's alpha powers.

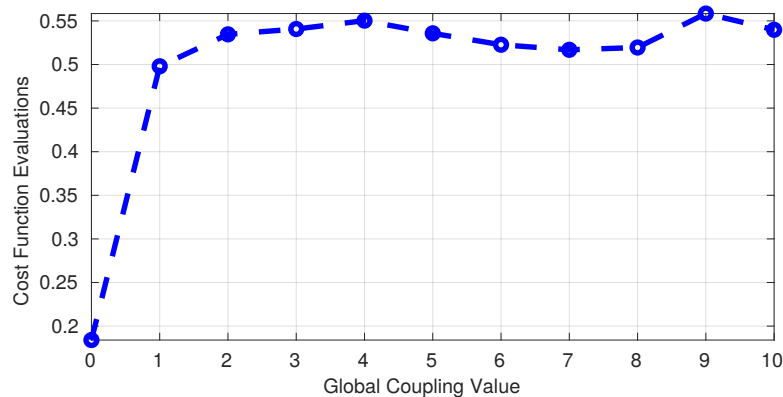

Figure 7: Global coupling parameter drastically changes the parameter space. Introducing a structural connectivity matrix with increasing global coupling parameter increases the cost-function evaluation, but does not continuously increase the evaluations as global coupling increases.

412 From the optimization results in Figure 5, we already see a change of less  
413 than 1% in cost function evaluations as the conditional minimization algo-  
414 rithm approached the 10<sup>th</sup> iteration, suggesting any of the solutions along the  
415 end of the conditional minimization algorithm could be a plausible solution.  
416 We selected parameter sets that computed cost-function evaluations within  
417  $\pm 1\%$  range of the final cost-function evaluation. The probability distribution  
418 of these optimized parameters are shown in Figure 10. The majority of the  
419 parameters from varying oscillators (VO) model shows a bimodal distribu-  
420 tion, with many peaks in the histogram suggesting different viable solutions  
421 that satisfies our goodness-of-fit criteria. On the other hand, the parameters  
422 chosen from the final iteration of the VOC-CM model shows a less obvious  
423 bimodal distribution with the exception of  $\tau_i$ . Additionally, the histogram  
424 peaks suggest that there are at least two highly probable parameter values  
425 for each parameter in both cases. Despite conditional minimization converging  
426 to a low cost-function evaluation that drop less than 1% after the 10th iter-  
427 ation, the parameters were still unable to converge to a single value, further  
428 emphasizing the difficulty of finding unique solutions to an over-specified  
429 model.

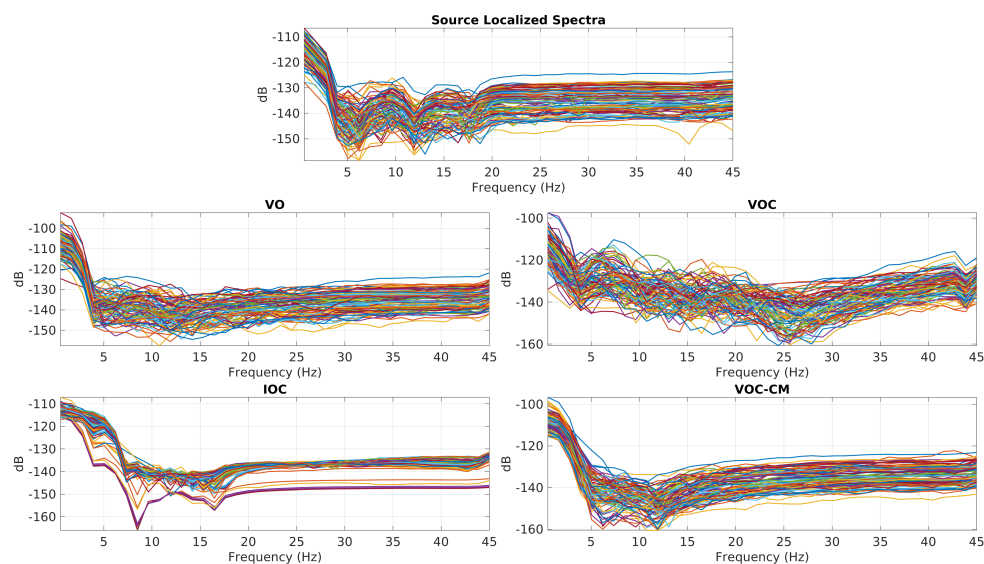

Figure 8: Optimized power spectra. (1) Source localized power spectrum for all 86 regions averaged over all subjects is shown at the top. Below the source localized spectra, going clockwise: (2) simulated varying oscillators (VO) model, (3) simulated network model with varying local parameters at each node (VOC), (4) simulated network model with identical local parameters at each node (IOC), and (5) simulated network model with varying local parameters optimized with conditional minimization (VOC-CM).

#### 430 4. Discussion

431 A challenge for emerging models of brain activity is that in a complex  
432 dynamical system such as the brain, it is difficult to predict function even if  
433 the underlying architecture, local cortical dynamics, and cortical-cortical in-  
434 teractions are known. In the present article, we studied the role of local and  
435 global parameters in a system of coupled oscillating neural mass (Wilson-  
436 Cowan) models, either unconnected or connected via white matter fibers as  
437 measured from diffusion-MRI. As described in previous network modeling  
438 efforts, coupled dynamical systems have a collective behavior that depends  
439 on the network structure, the local dynamics of each node, and the coupling  
440 function for the transfer of information [20, 45, 46]. Using different imple-  
441 mentations of the Wilson-Cowan oscillator model, we reproduced to varying  
442 degrees of success spatially varying spectral features of human source local-  
443 ized EEG at rest. Our results show that 1) introduction of the connectome  
444 to the oscillator model does not improve model fitting to source localized

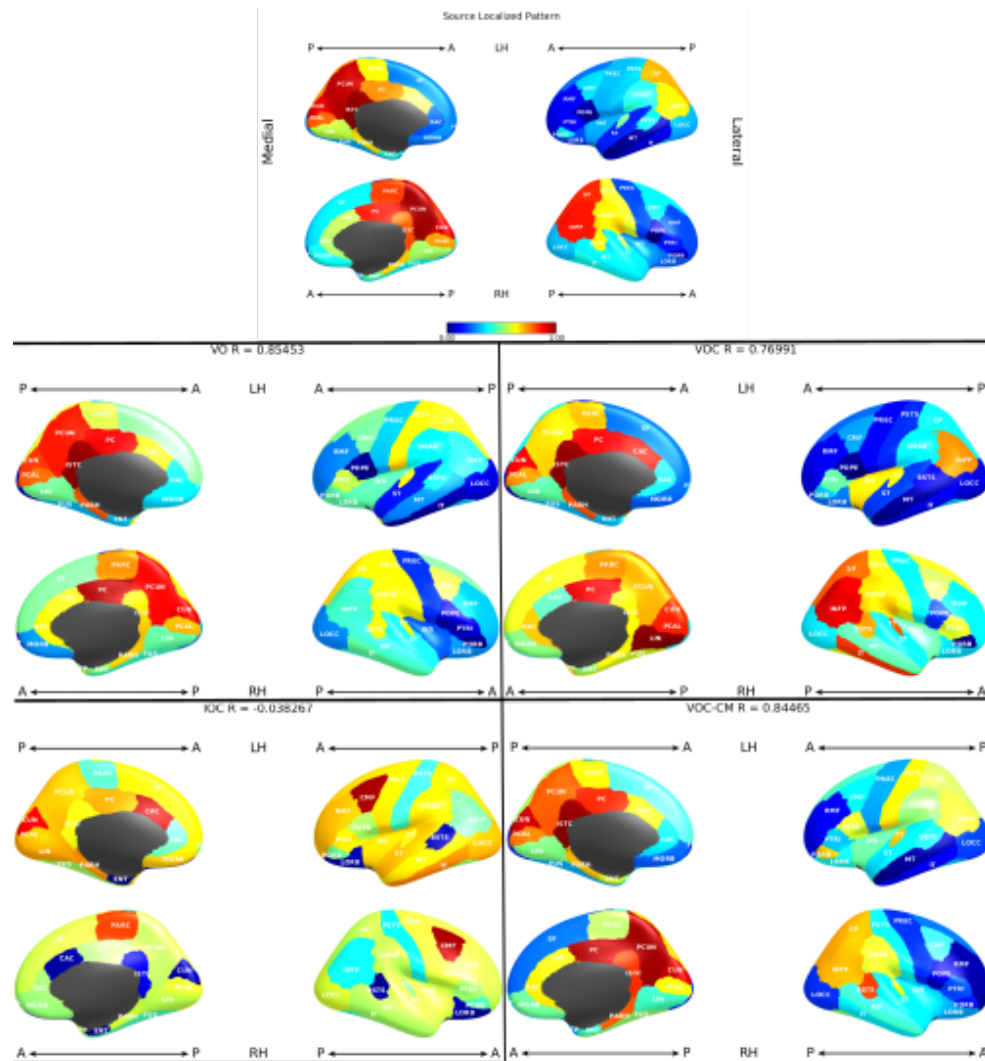

Figure 9: Spatial distribution of alpha band. Glass-brain showing the power in the alpha band averaged across all subjects. From top to bottom: (1) empirical data, (2) varying oscillators (VO) model, (3) varying oscillators with connectivity (VOC), (4) identical oscillators with connectivity (IOC), and (5) varying oscillators with connectivity, optimized using conditional minimization (VOC-CM). The radius of each spheres indicates the amount of power within the 8 – 12Hz range in the frequency domain, scaled by the mean of the alpha power over each region. Regions close or below the mean are shown by smaller spheres or not shown at all. Different lobes of the brain are color-coded for clarity.

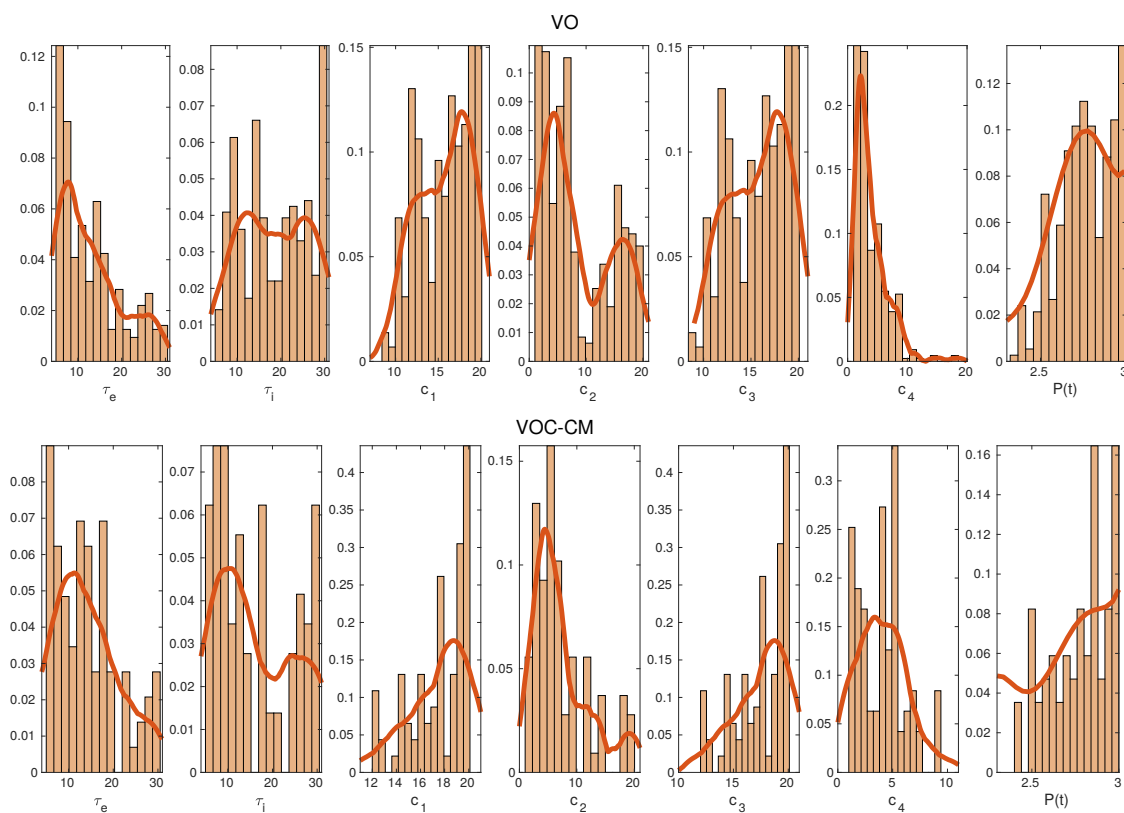

Figure 10: Best Fitting Model Parameters. Histograms showing the probability distribution of parameters chosen from  $\pm 1\%$  of the best fitting solution for the varying oscillators (VO, top) model and varying oscillators with connectivity, optimized using conditional minimization (VOC-CM, bottom).

445 EEG, 2) the identifiability problem manifests itself in the model's parameter  
 446 space as well as the spatial distribution of the modeled frequency profile.

447 First, we aimed to determine which configuration of our chosen neural  
 448 mass model best reproduces source localized EEG data. From our simula-  
 449 tions, it is clear that a model of individual oscillators at each brain region  
 450 (VO) is capable of reproducing the spatial and spectral patterns of EEG data.  
 451 While the absence of network topology in the VO model does not correctly  
 452 depict the interconnected brain regions, the one pair of oscillator model per  
 453 brain region fitting criteria is a much easier parameter inference problem than  
 454 inferring network model parameters. VOs simulations produced a mean KS-  
 455 stat of around 0.15, which is lowest out of all model variations. On the other

456 hand, network models (VOC, VOC-CM) were also able to produce the al-  
457 pha and beta spatial patterns that closely matched our source localized EEG  
458 data. The Jansen and Rit model [43] utilized realistic ratios of excitatory  
459 and inhibitory connections in a neuronal ensemble to arrive at their param-  
460 eter values, David and Friston [4] expanded on this idea and established a  
461 neural mass model with similar differences between excitatory and inhibitory  
462 parameters. Interestingly, IOC parameters exhibiting this difference between  
463 excitatory and inhibitory parameter values were not able to produce a sat-  
464 isfactory spectra or a posteriorly distributed alpha pattern, indicating the  
465 importance of allowing spatially varying local parameters in order to pro-  
466 duce characteristic neuronal patterns. In the IOC model, the only terms  
467 driving regional differences in the brain were the connectivity matrix, global  
468 coupling, and transmission velocity, which is an indirect way of determining  
469 the effect of introducing a connectome to an optimized network. Surpris-  
470 ingly, despite its anatomical relevance, the structural connectivity does not  
471 improve the model performance, but drastically alters the parameter space  
472 instead.

473 Our results show a simple addition of network connectivity to individual  
474 oscillators optimized independently at all brain regions does not improve the  
475 performance of the model. As shown in Figure 6 and 7, no amount of con-  
476 nectome coupling, while keeping the VO local parameters, improves model  
477 performance; in fact, it makes is substantially worse, with the KS-statistic  
478 cost function plateauing around 0.5-0.55 as global coupling increased gradu-  
479 ally, compared to the KS cost of the VO model of less than 0.2. We conjecture  
480 that the one-to-one fitting without any connectivity and transmission veloc-  
481 ity influences may have provided a simpler optimization problem than the  
482 network models. Because we used optimized local parameters from the VO  
483 model in VOC model, we expected similar or better model performance with  
484 the addition of a more physiological, interconnected brain network. However,  
485 despite optimized local dynamics at each node, the interconnected regions  
486 introduced an uphill move for the optimization algorithm instead of a down-  
487 hill move, suggesting the feedback from adjacent regions may be changing  
488 local dynamics that are not explainable by just a global coupling parameter  
489 and transmission velocity. Our conditional minimization algorithm was able  
490 to optimize our local and global parameters iteratively until we obtained a  
491 set of parameters that outperformed VOC. As described above, despite IOC  
492 having identical nodes, meaning only one set of local parameters for the en-  
493 tire network, the inferred parameters are high in variance and do not reflect

494 neurophysiological conditions. This is consistent with the findings by [47],  
495 suggesting that network dynamics do not only depend on anatomical connec-  
496 tivity, but also on "state-dependent dynamical regimes of the brain regions"  
497 and on the heterogeneity of node degrees.

498 The surface-plots displaying the spatial distribution of each model vari-  
499 ation's alpha pattern highlight the identifiability problem of network neural  
500 mass models. Despite the differences in parameterization, all models show  
501 spatial alpha patterns that are identical to each other with the exception  
502 of IOC. In the frequency domain, there are recognizable differences in the  
503 power spectra produced by each model, however, the minor differences do  
504 not necessarily capture the neurophysiological oscillations that translates to  
505 function. Additionally, the histograms in 10 shows there are many probable  
506 solutions that provide satisfactory spectra according to our goodness-of-fit  
507 criterion.

508 To capture function deteriorations in a diseased brain by mathematical  
509 models, there has been many recent attempts to correlate neural mass model  
510 parameters with stroke recovery [31, 48, 49], Alzheimer's disease [50], and  
511 epilepsy [51]. However, all these efforts neglect the over-parameterization of  
512 the models by expanding neural masses to networks in order to maximize a  
513 fit to functional connectivity. Correlating a set of parameters with a change  
514 in functional connectivity does not mean such parameter shifts are meaning-  
515 ful enough to diagnose disease, as another set of parameters may capture the  
516 same functional connectivity just as well. Our results show the manifestation  
517 of identifiability problems in neural mass models as a challenge to diagnosing  
518 disease via mathematical models, as network models need to capture both  
519 functional and spatial information in order to fully capture disease spread.  
520 During parameter inference, careful inspection of the parameter distribution  
521 and model behavior is needed to obtain parameters that converged to a uni-  
522 form distribution. We believe low dimensional models with parameter con-  
523 straints may avoid the identifiability problem and provide more meaningful  
524 model parameters.

## 525 5. Bibliography

- 526 [1] F. H. Lopes da Silva, A. Hoeks, H. Smits, and L. H. Zetterberg.  
527 Model of brain rhythmic activity - The alpha-rhythm of the thala-  
528 mus. *Kybernetik*, 15(1):27-37, may 1974.

- 529 [2] Paul L. Nunez. Wavelike Properties of the Alpha Rhythm. *IEEE*  
530 *Transactions on Biomedical Engineering*, BME-21(6):473–482, nov  
531 1974.
- 532 [3] H R Wilson and J D Cowan. Excitatory and inhibitory interac-  
533 tions in localized populations of model neurons. *Biophysical jour-*  
534 *nal*, 12(1):1–24, 1972.
- 535 [4] Olivier David and Karl J Friston. A neural mass model for  
536 MEG/EEG: Coupling and neuronal dynamics. *NeuroImage*,  
537 20(3):1743–1755, 2003.
- 538 [5] Walter J Freeman. Tutorial on neurobiology: from single neurons  
539 to brain chaos. *International Journal of Bifurcation and Chaos*,  
540 02(03):451–482, sep 1992.
- 541 [6] Andreas Spiegler, Stefan J. Kiebel, Fatihcan M. Atay, and  
542 Thomas R. Knösche. Bifurcation analysis of neural mass models:  
543 Impact of extrinsic inputs and dendritic time constants. *NeuroIm-*  
544 *age*, 52(3):1041–1058, 2010.
- 545 [7] Andreas Spiegler, Thomas R. Knösche, Karin Schwab, Jens  
546 Haueisen, and Fatihcan M. Atay. Modeling brain resonance phe-  
547 nomena using a neural mass model. *PLoS Computational Biology*,  
548 7(12), 2011.
- 549 [8] Yong He, Zhang J. Chen, and Alan C. Evans. Small-world anatomi-  
550 cal networks in the human brain revealed by cortical thickness from  
551 MRI. *Cerebral Cortex*, 17(10):2407–2419, 2007.
- 552 [9] D. Mantini, M G Perrucci, C Del Gratta, G L Romani, and M Cor-  
553 betta. Electrophysiological signatures of resting state networks in  
554 the human brain. *Proceedings of the National Academy of Sciences*  
555 *of the United States of America*, 104(32):13170–5, 2007.
- 556 [10] Randy L. Buckner, Jessica R. Andrews-Hanna, and Daniel L.  
557 Schacter. The brain’s default network: Anatomy, function, and  
558 relevance to disease. *Annals of the New York Academy of Sciences*,  
559 1124:1–38, 2008.



- 560 [11] Peter J Uhlhaas and Wolf Singer. Abnormal neural oscillations and  
561 synchrony in schizophrenia. *Nature Reviews Neuroscience*, 11:100,  
562 feb 2010.
- 563 [12] Vladimir L. Cherkassky, Rajesh K. Kana, Timothy A. Keller, and  
564 Marcel Adam Just. Functional connectivity in a baseline resting-  
565 state network in autism. *NeuroReport*, 17(16):1687–1690, nov 2006.
- 566 [13] Matthew B. Symond, Anthony W F Harris, Evian Gordon,  
567 and Leanne M. Williams. "Gamma synchrony" in first-episode  
568 schizophrenia: A disorder of temporal connectivity? *American*  
569 *Journal of Psychiatry*, 162(3):459–465, mar 2005.
- 570 [14] Olaf Sporns. The human connectome: A complex network. *Annals*  
571 *of the New York Academy of Sciences*, 1224(1):109–125, 2011.
- 572 [15] Christopher J Honey, Rolf Kötter, Michael Breakspear, and Olaf  
573 Sporns. Network structure of cerebral cortex shapes functional  
574 connectivity on multiple time scales. *Proceedings of the National*  
575 *Academy of Sciences*, 104(24):10240–10245, 2007.
- 576 [16] Anandamohan Ghosh, Y. Rho, A. R. McIntosh, R. Kötter, and  
577 V. K. Jirsa. Noise during rest enables the exploration of the brain's  
578 dynamic repertoire. *PLoS Computational Biology*, 4(10), 2008.
- 579 [17] Gustavo Deco, Mario Senden, and Viktor Jirsa. How anatomy  
580 shapes dynamics: a semi-analytical study of the brain at rest by a  
581 simple spin model. *Frontiers in computational neuroscience*, 6:68,  
582 jan 2012.
- 583 [18] Sarah Feldt Muldoon, Fabio Pasqualetti, Matthew Cieslak, Scott T.  
584 Grafton, Jean M. Vettel, and Danielle S. Bassett. Stimulation-  
585 Based Control of Dynamic Brain Networks. *PLoS computational*  
586 *biology*, 12(9):e1005076. doi:10.1371/journal.pcbi.1005076, 2016.
- 587 [19] P. A. Valdes, J. C. Jimenez, J. Riera, R. Biscay, and T. Ozaki.  
588 Nonlinear EEG analysis based on a neural mass model. *Biological*  
589 *Cybernetics*, 81(5-6):415–424, nov 1999.

- 590 [20] G. Schmidt, G. Zamora-López, and J. Kurths. Simulation of Large  
591 Scale Cortical Networks By Individual Neuron Dynamics. *Internation-*  
592 *Journal of Bifurcation and Chaos*, 20(03):859–867, 2010.
- 593 [21] Mario Senden, Niels Reuter, Martijn P. van den Heuvel, Rainer  
594 Goebel, and Gustavo Deco. Cortical rich club regions can orga-  
595 nize state-dependent functional network formation by engaging in  
596 oscillatory behavior. *NeuroImage*, 146(April 2016):561–574, 2017.
- 597 [22] Mary A.B. Brazier. Studies of the EEG activity of limbic struc-  
598 tures in man. *Electroencephalography and Clinical Neurophysiology*,  
599 25(4):309–318, oct 1968.
- 600 [23] K Huh, K J Meador, G P Lee, D W Loring, A M Murro, D W King,  
601 B B Gallagher, J R Smith, and H F Flanigin. Human hippocampal  
602 EEG: effects of behavioral activation. *Neurology*, 40(8):1177–81,  
603 aug 1990.
- 604 [24] K J Meador, J L Thompson, D W Loring, A M Murro, D W King,  
605 B B Gallagher, G P Lee, J R Smith, and H F Flanigin. Behav-  
606 ioral state-specific changes in human hippocampal theta activity.  
607 *Neurology*, 41(6):869–72, jun 1991.
- 608 [25] Masaki Nishida, Nobuhide Hirai, Fumikazu Miwakeichi, Taketoshi  
609 Maehara, Kensuke Kawai, Hiroyuki Shimizu, and Sunao Uchida.  
610 Theta oscillation in the human anterior cingulate cortex during all-  
611 night sleep: an electrocorticographic study. *Neuroscience Research*,  
612 50(3):331–341, nov 2004.
- 613 [26] Fabio Moroni, Lino Nobili, Fabrizio De Carli, Marcello Massi-  
614 mini, Stefano Francione, Cristina Marzano, Paola Proserpio, Carlo  
615 Cipolli, Luigi De Gennaro, and Michele Ferrara. Slow EEG rhythms  
616 and inter-hemispheric synchronization across sleep and wakefulness  
617 in the human hippocampus. *NeuroImage*, 60(1):497–504, mar 2012.
- 618 [27] Herbert Jasper and Wilder Penfield. Electrocorticograms in man:  
619 Effect of voluntary movement upon the electrical activity of the  
620 precentral gyrus. *Archiv für Psychiatrie und Nervenkrankheiten*,  
621 183(1-2):163–174, 1949.

- 622 [28] Carl W Sem-Jacobsen, Reginald G Bickford, Magnus C Peterson,  
623 and Henry W Dodge Jr. Depth Distribution of Normal Electroen-  
624 cephalographic Rhythms, mar 1953.
- 625 [29] Carlos Perez-Borja, Gian Emilio Chatrian, Francis A. Tyce, and  
626 Morris H. Rivers. Electrographic patterns of the occipital lobe in  
627 man: A topographic study based on use of implanted electrodes.  
628 *Electroencephalography and Clinical Neurophysiology*, 14(2):171–  
629 182, apr 1962.
- 630 [30] Dipanjan Roy, Rodrigo Sigala, Michael Breakspear, Anthony Ran-  
631 dal McIntosh, Viktor K. Jirsa, Gustavo Deco, and Petra Ritter.  
632 Using the Virtual Brain to Reveal the Role of Oscillations and  
633 Plasticity in Shaping Brain’s Dynamical Landscape. *Brain Con-*  
634 *nectivity*, 4(10):791–811, 2014.
- 635 [31] Maria Inez Falcon, Jeffrey D. Riley, Viktor Jirsa, Anthony R.  
636 McIntosh, Ahmed D. Shereen, E. Elinor Chen, and Ana Solodkin.  
637 The virtual brain: Modeling biological correlates of recovery after  
638 chronic stroke. *Frontiers in Neurology*, 6(NOV):1–13, 2015.
- 639 [32] V. K. Jirsa, O. Sporns, M. Breakspear, G. Deco, and A. R. Mcin-  
640 tosh. Towards the virtual brain: Network modeling of the intact and  
641 the damaged brain. *Archives Italiennes de Biologie*, 148(3):189–205,  
642 2010.
- 643 [33] A. Spiegler and V. Jirsa. Systematic approximations of neural fields  
644 through networks of neural masses in the virtual brain. *NeuroImage*,  
645 83(March):704–725, 2013.
- 646 [34] A. Kuceyeski, S. Shah, J. P. Dyke, S. Bickel, F. Abdelnour, N. D.  
647 Schiff, H. U. Voss, and A. Raj. The application of a mathematical  
648 model linking structural and functional connectomes in severe brain  
649 injury. *NeuroImage: Clinical*, 11:635–647, 2016.
- 650 [35] Bruce Fischl, David H Salat, Evelina Busa, Marilyn Albert, Megan  
651 Dieterich, Christian Haselgrove, Andre Van Der Kouwe, Ron Kil-  
652 liany, David Kennedy, Shuna Klaveness, Albert Montillo, Nikos  
653 Makris, Bruce Rosen, and Anders M Dale. Whole Brain Segmen-  
654 tation : Automated Labeling of Neuroanatomical Structures in the  
655 Human Brain. *Neuron*, 33:341–355, 2002.

- 656 [36] Y. Iturria-Medina, E. J. Canales-Rodríguez, L. Melie-García, P. A.  
657 Valdés-Hernández, E. Martínez-Montes, Y. Alemán-Gómez, and  
658 J. M. Sánchez-Bornot. Characterizing brain anatomical connec-  
659 tions using diffusion weighted MRI and graph theory. *NeuroImage*,  
660 36(3):645–660, 2007.
- 661 [37] Francois Tadel, Sylvain Baillet, John C. Mosher, Dimitrios Pantazis,  
662 and Richard M. Leahy. Brainstorm: A user-friendly application for  
663 MEG/EEG analysis. *Computational Intelligence and Neuroscience*,  
664 2011:879716, apr 2011.
- 665 [38] C J Holmes, R Hoge, L Collins, R Woods, a W Toga, and a C Evans.  
666 Enhancement of MR images using registration for signal averaging.  
667 *Journal of computer assisted tomography*, 22(2):324–333, 2015.
- 668 [39] Guido Nolte and George Dassios. Analytic expansion of the EEG  
669 lead field for realistic volume conductors. *Physics in Medicine and*  
670 *Biology*, 50(16):3807–3823, aug 2005.
- 671 [40] Barry D. Van Veen, Wim Van Drongelen, Moshe Yuchtman, and  
672 Akifumi Suzuki. Localization of brain electrical activity via linearly  
673 constrained minimum variance spatial filtering. *IEEE Transactions*  
674 *on Biomedical Engineering*, 44(9):867–880, 1997.
- 675 [41] S Kirkpatrick, C D Gelatt, and M P Vecchi. Optimization by Sim-  
676 ulated Annealing. *Science*, 220(4598):671–680, 1983.
- 677 [42] E. LoCastro, A. Kuceyeski, and A. Raj. Brainography: an atlas-  
678 independent surface and network rendering tool for neural connec-  
679 tivity visualization, apr 2014.
- 680 [43] Ben H Jansen and Vincent G Rit. Biological Cybernetics Electroen-  
681 cephalogram and visual evoked potential generation in a mathemat-  
682 ical model of coupled cortical columns. Technical report, 1995.
- 683 [44] P. A. Robinson, C. J. Rennie, J. J. Wright, H. Bahramali, E. Gor-  
684 don, and D. L. Rowe. Prediction of electroencephalographic spectra  
685 from neurophysiology. *Physical Review E - Statistical, Nonlinear,*  
686 *and Soft Matter Physics*, 2001.

- 687 [45] Liang Huang, Qingfei Chen, Ying Cheng Lai, and Louis M. Pecora.  
688 Generic behavior of master-stability functions in coupled nonlinear  
689 dynamical systems. *Physical Review E - Statistical, Nonlinear, and*  
690 *Soft Matter Physics*, 80(3):1–11, 2009.
- 691 [46] Arnaud Messé, David Rudrauf, Habib Benali, and Guillaume Mar-  
692 relec. Relating structure and function in the human brain: rel-  
693 ative contributions of anatomy, stationary dynamics, and non-  
694 stationarities. *PLoS computational biology*, 10(3):e1003530, mar  
695 2014.
- 696 [47] R. G. Bettinardi, G. Deco, V. M. Karlaftis, T. J. Van Hartevelt,  
697 H. M. Fernandes, Z. Kourtzi, M. L. Kringelbach, and G. Zamora-  
698 López. How structure sculpts function: Unveiling the contribution  
699 of anatomical connectivity to the brain’s spontaneous correlation  
700 structure. *Chaos*, 27(4), 2017.
- 701 [48] Maria I Falcon, Viktor Jirsa, and Ana Solodkin. A new neuroinfor-  
702 matics approach to personalized medicine in neurology: The Virtual  
703 Brain. *Current opinion in neurology*, 29(4):429–36, aug 2016.
- 704 [49] Mohit H Adhikari, A. Raja Beharelle, Alessandra Griffa, Patric  
705 Haggmann, Ana Solodkin, A. R. McIntosh, Steven L Small, and  
706 Gustavo Deco. Computational Modeling of Resting-State Activity  
707 Demonstrates Markers of Normalcy in Children with Prenatal or  
708 Perinatal Stroke. *Journal of Neuroscience*, 35(23):8914–8924, 2015.
- 709 [50] J. Zimmermann, A. Perry, M. Breakspear, M. Schirner, P. Sachdev,  
710 W. Wen, N. A. Kochan, M. Mapstone, P. Ritter, A. R. McIntosh,  
711 and A. Solodkin. Differentiation of Alzheimer’s disease based on  
712 local and global parameters in personalized Virtual Brain models.  
713 *NeuroImage: Clinical*, 19:240–251, 2018.
- 714 [51] V.K. Jirsa, T. Proix, D. Perdakis, M.M. Woodman, H. Wang,  
715 J. Gonzalez-Martinez, C. Bernard, C. Bénar, M. Guye, P. Chauvel,  
716 and F. Bartolomei. The Virtual Epileptic Patient: Individualized  
717 whole-brain models of epilepsy spread. *NeuroImage*, 145:377–388,  
718 jan 2017.

719 **6. Supplementary Material**

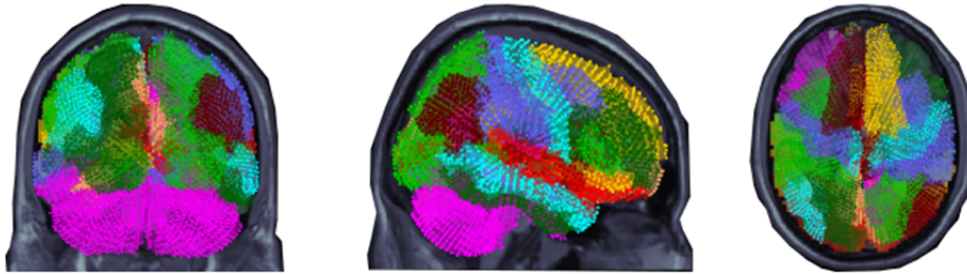

Figure S1: Dots representing volumetric source locations mapped to their respective regions of interest (ROI) viewed from the back, right, and top. Different colors represent the 86 segmented regions in the FreeSurfer Desikan-Killany atlas, each ROI is viewed as a node on the connectome.

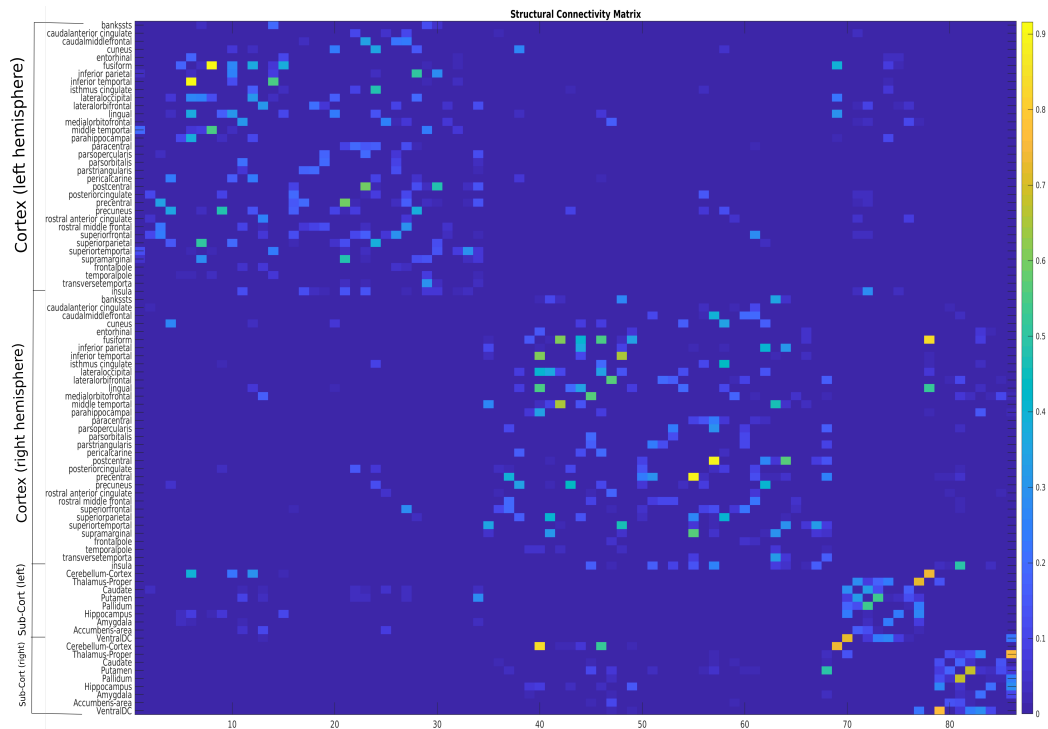

Figure S2: Structural connectivity matrix of one representative subject.

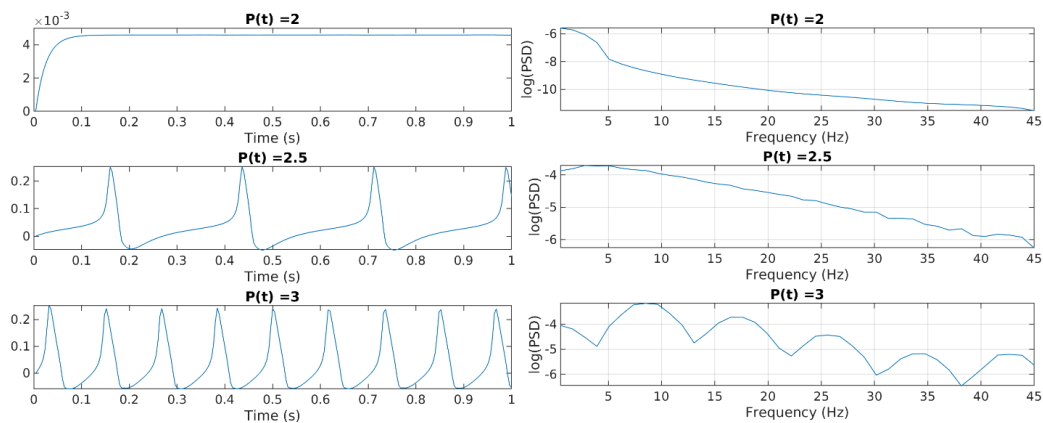

Figure S3: Neural mass model's oscillatory activity changes as external drive parameter  $P(t)$  is gradually increased at one node.

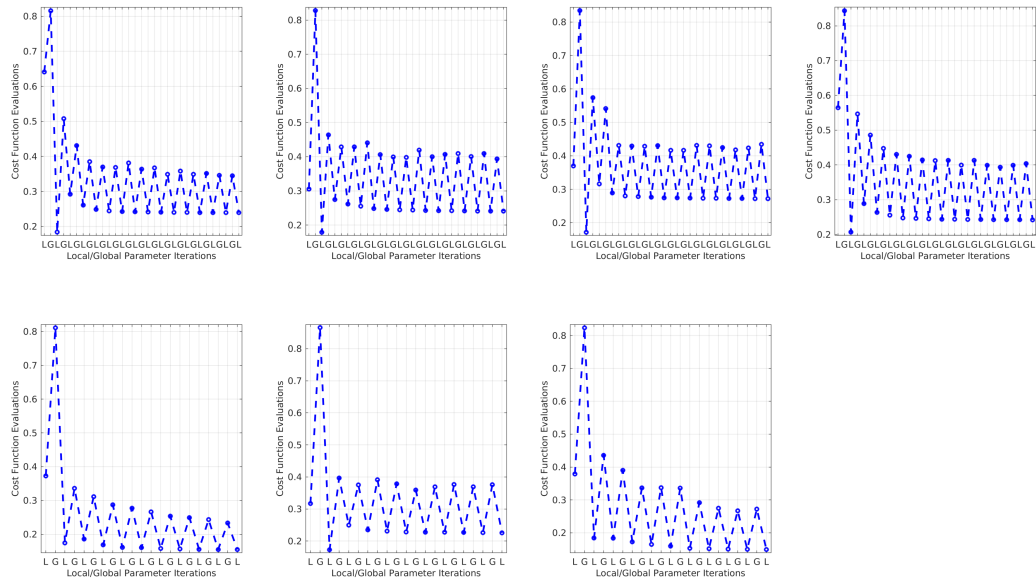

Figure S4: Conditional minimization performance for all subjects.
